# Supplementary material
Source: publisher figshare collection journal article supplement (https://acs.figshare.com/ndownloader/files/18028745)
Supplement: Supplementary file 1 [file 18028745]

Compound	SMILE	E. coli MIC90 (+DP)/ µM	E. coli MIC90 (+DP, +100x Fe siderophore)/ µM	E. coli MIC90 (MHII)/ µM	S. aureus RN4220 MIC90/ µM	P. aeruginosa PA01 MIC90/ µM	K. pneumoniae CRE-11 MIC90/ µM
P1	OC([C@H](CCCNC(OC(C)(C)C)=O)NC(OCC1=CC=CC=C1)=O)=O
P2	OC([C@H](CCCNC(OC(C)(C)C)=O)NC([C@H](CCCNC(OC(C)(C)C)=O)NC([C@H](CCCNC(OC(C)(C)C)=O)NC(OCC1=CC=CC=C1)=O)=O)=O)=O
P3	OC([C@H](CCCN)NC([C@H](CCCN)NC([C@H](CCCN)NC(OCC1=CC=CC=C1)=O)=O)=O)=O
P4	OC([C@H](CCCNO)NC([C@H](CCCNO)NC([C@H](CCCNO)NC(OCC1=CC=CC=C1)=O)=O)=O)=O
P5	OC([C@H](CCCN(C(C)=O)OC(C)=O)NC([C@H](CCCN(C(C)=O)OC(C)=O)NC([C@H](CCCN(C(C)=O)OC(C)=O)NC(OCC1=CC=CC=C1)=O)=O)=O)=O
A1	OC([C@H](CCCN(O)C(C)=O)NC([C@H](CCCN(O)C(C)=O)NC([C@H](CCCN(O)C(C)=O)NC(OCC1=CC=CC=C1)=O)=O)=O)=O
A2	[H]N[C@@H](CCCN(O)C(C)=O)C(N[C@@H](CCCN(O)C(C)=O)C(N[C@@H](CCCN(O)C(C)=O)C(O)=O)=O)=O
B1	O=C(N1CCN(C2=CC(N(C3CC3)C=C(C(O)=O)C4=O)=C4C=C2F)CC1)CCNC(OCC5C(C=CC=C6)=C6C7=C5C=CC=C7)=O
B2	NCCC(N1CCN(C2=CC(N(C3CC3)C=C(C(O)=O)C4=O)=C4C=C2F)CC1)=O
B3	O=C(N1CCN(C2=CC(N(C3CC3)C=C(C(O)=O)C4=O)=C4C=C2F)CC1)CCNC([C@H](CCCN(OC(C)=O)C(C)=O)NC(OCC5=CC=CC=C5)=O)(N[C@@H](CCCN(OC(C)=O)C(C)=O)C(N[C@@H](CCCN(OC(C)=O)C(C)=O)C=O)=O)=O
C1	OC(CCC(N1CCN(C2=CC(N(C3CC3)C=C(C(O)=O)C4=O)=C4C=C2F)CC1)=O)=O
Ga-DFO	NCCCCCN(O1)C(CC2)=O[Ga]1345ON(C(CCC(NCCCCCN(C(C)=O5)O4)=O)=O3)CCCCCNC2=O
Ga-LDFC	O=C(N[C@@H]1C(C[C@@H](CCCN(O2)C(C)=O3)C(O)=O)=O)[C@H](CCCN(C(C)=O4)O[Ga]3254O=C(C)N(O5)CCC1)N
apo-D1	O=C(CCC(N1CCN(C2=CC(N(C3CC3)C=C(C(O)=O)C4=O)=C4C=C2F)CC1)=O)NCCCCCN(O)C(CCC(NCCCCCN(O)C(CCC(NCCCCCN(C(C)=O)O)=O)=O)=O)=O	0.97	1.9	3.8
Ga-D1	O=C(CCC(N1CCN(C2=CC(N(C3CC3)C=C(C(O)=O)C4=O)=C4C=C2F)CC1)=O)NCCCCCN(O5)C(CC6)=O[Ga]5789ON(C(CCC(NCCCCCN(C(C)=O9)O8)=O)=O7)CCCCCNC6=O	1.9	30	3.8
Fe-D1	O=C(CCC(N1CCN(C2=CC(N(C3CC3)C=C(C(O)=O)C4=O)=C4C=C2F)CC1)=O)NCCCCCN(O5)C(CC6)=O[Fe]5789ON(C(CCC(NCCCCCN(C(C)=O9)O8)=O)=O7)CCCCCNC6=O	3.8	7.5	10
apo-D2	O=C(N[C@@H](CCCN(C(C)=O)O)C(C[C@@H](CCCN(O)C(C)=O)C(NCCC(N1CCN(C2=CC(N(C3CC3)C=C(C(O)=O)C4=O)=C4C=C2F)CC1)=O)=O)=O)[C@H](CCCN(C(C)=O)O)N	0.23	> 100	0.23	15	7.5	> 100
Ga-D2	O=C(N[C@@H]1C(C[C@@H](CCCN(O2)C(C)=O3)C(NCCC(N4CCN(C5=CC(N(C6CC6)C=C(C(O)=O)C7=O)=C7C=C5F)CC4)=O)=O)=O)[C@H](CCCN(C(C)=O8)O[Ga]3298O=C(C)N(O9)CCC1)N	0.23	15	0.23	0.94	3.8	12.5
Fe-D2	O=C(N[C@@H]1C(C[C@@H](CCCN(O2)C(C)=O3)C(NCCC(N4CCN(C5=CC(N(C6CC6)C=C(C(O)=O)C7=O)=C7C=C5F)CC4)=O)=O)=O)[C@H](CCCN(C(C)=O8)O[Fe]3298O=C(C)N(O9)CCC1)N	0.94	15	0.94	> 30	> 30	> 30
apo-D3	O=C(N[C@@H](CCCN(C(C)=O)O)C(C[C@@H](CCCN(O)C(C)=O)C(N[C@@H](CO)C(N[C@@H](C(O)=O)[C@@H](O)[C@]1(S[C@@H](N2C=C/C(N(C)C2=O)=N\C(N)=O)[C@H](O)[C@H]1O)[H])=O)=O)=O)[C@H](CCCN(C(C)=O)O)N
Ga-D3	O=C(N[C@@H]1C(C[C@@H](CCCN(O2)C(C)=O3)C(N[C@@H](CO)C(N[C@@H](C(O)=O)[C@@H](O)[C@]4(S[C@@H](N5C=C/C(N(C)C5=O)=N\C(N)=O)[C@H](O)[C@H]4O)[H])=O)=O)=O)[C@H](CCCN(C(C)=O6)O[Ga]3276O=C(C)N(O7)CCC1)N
Fe-D3	O=C(N[C@@H]1C(C[C@@H](CCCN(O2)C(C)=O3)C(N[C@@H](CO)C(N[C@@H](C(O)=O)[C@@H](O)[C@]4(S[C@@H](N5C=C/C(N(C)C5=O)=N\C(N)=O)[C@H](O)[C@H]4O)[H])=O)=O)=O)[C@H](CCCN(C(C)=O6)O[Fe]3276O=C(C)N(O7)CCC1)N	0.00023			0.94	> 30	0.00023
